# Supplementary material for: Telemedicine Curriculum in an Ophthalmology Residency Program
Source: PubMed Central journal article supplement — J Acad Ophthalmol (2017). 2022 Mar 10;14(1):e93–e102. doi: 10.1055/s-0042-1743580 (PMC9927988; doi:10.1055/s-0042-1743580), 2022-03-10
Supplement: 10-1055-s-0042-1743580-s305ra.pdf [file 10-1055-s-0042-1743580-s305ra.pdf]

## Supplementary Material

### Telemedicine Survey of Ophthalmology Residency Program Residents at Massachusetts Eye and Ear (MEE)

|                                                                                                                                                                                                                                                                                                                                                                                                                                               |                                                                                                                                                                                                                                         |
|-----------------------------------------------------------------------------------------------------------------------------------------------------------------------------------------------------------------------------------------------------------------------------------------------------------------------------------------------------------------------------------------------------------------------------------------------|-----------------------------------------------------------------------------------------------------------------------------------------------------------------------------------------------------------------------------------------|
| I agree to participate in this research:                                                                                                                                                                                                                                                                                                                                                                                                      | Yes<br>No                                                                                                                                                                                                                               |
| <b>A. Background Information:</b>                                                                                                                                                                                                                                                                                                                                                                                                             |                                                                                                                                                                                                                                         |
| This section strives to better understand the survey respondent characteristics.                                                                                                                                                                                                                                                                                                                                                              |                                                                                                                                                                                                                                         |
| Please indicate your year in training:                                                                                                                                                                                                                                                                                                                                                                                                        | PGY2<br>PGY3<br>PGY4                                                                                                                                                                                                                    |
| Please indicate your planned area of practice/subspecialty:                                                                                                                                                                                                                                                                                                                                                                                   | Comprehensive<br>Cornea<br>Retina<br>Glaucoma<br>Pediatrics<br>Oculoplastics<br>Neuro-ophthalmology<br>Uveitis<br>Industry/Nonclinical<br>Undecided                                                                                     |
| Please indicate your age:                                                                                                                                                                                                                                                                                                                                                                                                                     | < 25<br>25<br>26<br>27<br>28<br>29<br>30<br>31<br>32<br>33<br>34<br>35<br>36<br>37<br>38<br>39<br>> 39                                                                                                                                  |
| Please indicate your sex:                                                                                                                                                                                                                                                                                                                                                                                                                     | Female<br>Male<br>Prefer not to say                                                                                                                                                                                                     |
| Please indicate your racial or ethnic identity:                                                                                                                                                                                                                                                                                                                                                                                               | White<br>Black or African American<br>Asian or Asian Indian<br>Hispanic, Latino, or Spanish<br>American Indian or Alaska Native<br>Middle Eastern or Northern African<br>Native Hawaiian or Other Pacific Islander<br>Prefer not to say |
| <b>B. Telemedicine:</b>                                                                                                                                                                                                                                                                                                                                                                                                                       |                                                                                                                                                                                                                                         |
| This section aims to understand your current exposure and future plans related to telemedicine.                                                                                                                                                                                                                                                                                                                                               |                                                                                                                                                                                                                                         |
| For the purposes of this survey, 'telemedicine' or 'telemedicine visit' is defined as 'a formal structured clinical encounter conducted remotely from the patient to provide diagnostic or treatment information to a patient or a consulting physician'. This can take place either via telephone, video, or remote review of images/video with a generated report. For the purposes of this survey, this does NOT include patient telephone | I understand                                                                                                                                                                                                                            |

(Continued)

(Continued)

|                                                                                                                                                                                                                          |                                                                                                                                  |
|--------------------------------------------------------------------------------------------------------------------------------------------------------------------------------------------------------------------------|----------------------------------------------------------------------------------------------------------------------------------|
| calls to answer questions about medications or non-structured phone calls to answer quick clinical questions                                                                                                             |                                                                                                                                  |
| Have you participated in a formal telemedicine curriculum during your MEE Ophthalmology Residency?                                                                                                                       | Yes<br>No                                                                                                                        |
| If yes, please rate your satisfaction with the current telemedicine curricular component                                                                                                                                 | Satisfied<br>Somewhat Satisfied<br>Neutral<br>Somewhat Unsatisfied<br>Unsatisfied                                                |
| Please rate your confidence in your knowledge and skill in conducting the following components of a telemedicine eye exam                                                                                                |                                                                                                                                  |
| Setup - Logistics of a proper encounter (e.g., audio/video, lighting, background, how to use software...)                                                                                                                | Confident<br>Somewhat Confident<br>Neutral<br>Somewhat Unconfident<br>Not at all Confident                                       |
| History - Patient interaction (e.g., best practices for telephone/video calls)                                                                                                                                           | Confident<br>Somewhat Confident<br>Neutral<br>Somewhat Unconfident<br>Not at all Confident                                       |
| Exam - Collecting clinical data via telemedicine visits (e.g., VA, pupils, external exam, anterior segment exam, limitations)                                                                                            | Confident<br>Somewhat Confident<br>Neutral<br>Somewhat Unconfident<br>Not at all Confident                                       |
| Documentation (e.g., telehealth note-writing, billing/coding, interprofessional interactions)                                                                                                                            | Confident<br>Somewhat Confident<br>Neutral<br>Somewhat Unconfident<br>Not at all Confident                                       |
| Education (e.g., ensuring proper attending oversight and feedback; learning how to triage ophthalmic complaints via telemedicine)                                                                                        | Confident<br>Somewhat Confident<br>Neutral<br>Somewhat Unconfident<br>Not at all Confident                                       |
| Please rank your current level of comfort in being able to apply real-world technological solutions to address issues of ethics and professionalism in telemedicine                                                      | Complete knowledge base<br>Good knowledge base<br>Moderate knowledge base<br>Somewhat poor knowledge base<br>Poor knowledge base |
| Please rank your current level of comfort in being able to apply real-world technological solutions to address health disparities in telemedicine                                                                        | Complete knowledge base<br>Good knowledge base<br>Moderate knowledge base<br>Somewhat poor knowledge base<br>Poor knowledge base |
| Have you personally been involved in the clinical care of a patient via an ophthalmic telemedicine visit?                                                                                                                | Yes<br>No                                                                                                                        |
| If yes, please provide an approximate number of telemedicine visits where you were involved in the provision of clinical care to patients in the last academic year.                                                     | 1-3<br>4-6<br>7-9<br>10 or more                                                                                                  |
| If yes, has your telemedicine experience been in providing direct patient care, shadowing another physician offering telemedicine visits, or both?                                                                       | Direct patient care<br>Shadowing<br>Both                                                                                         |
| If yes, has your telemedicine experience been in providing synchronous (real-time video or telephone visit with a patient), asynchronous (store-and-forward review of an image or video without a real-time in-person or | Synchronous<br>Asynchronous<br>Hybrid<br>Remote Monitoring                                                                       |

(Continued)

|                                                                                                                                                                                                                                |                                                                                                                                                                                                                                                                                                   |
|--------------------------------------------------------------------------------------------------------------------------------------------------------------------------------------------------------------------------------|---------------------------------------------------------------------------------------------------------------------------------------------------------------------------------------------------------------------------------------------------------------------------------------------------|
| video/telephone call), hybrid (patient obtains testing such as HVF or OCT + telemedicine visit), or remote monitoring (remote evaluation of patient-provided 'wearable' data such as IOP) telemedicine? Select all that apply. |                                                                                                                                                                                                                                                                                                   |
| Do you believe that you will use telemedicine in your future day to day practice?                                                                                                                                              | Yes<br>No<br>Unsure                                                                                                                                                                                                                                                                               |
| How important will telemedicine be for ophthalmologists in the future                                                                                                                                                          | Important<br>Rather important<br>Moderately important<br>Minimally important<br>Unimportant                                                                                                                                                                                                       |
| How important is it that telemedicine be taught during ophthalmology residency?                                                                                                                                                | Important<br>Rather important<br>Moderately important<br>Minimally important<br>Unimportant                                                                                                                                                                                                       |
| How comfortable are you in triaging a patient via a telemedicine visit at present?                                                                                                                                             | Comfortable<br>Rather comfortable<br>Moderately comfortable<br>Minimally comfortable<br>Uncomfortable                                                                                                                                                                                             |
| Which of the following conditions do you think can be appropriately TRIAGED (i.e., determine necessity of an in-person visit) via telemedicine instead of in-person? Select all that apply                                     | Acute conjunctivitis<br>Diabetic retinopathy<br>Age related macular degeneration<br>Primary open angle glaucoma<br>Acute angle closure glaucoma<br>Uveitis<br>Retinal detachment<br>Cataract<br>Retinopathy of prematurity<br>Strabismus<br>Optic neuritis<br>Corneal abrasions<br>Ruptured globe |
| How comfortable are you in making diagnoses via a telemedicine visit at present?                                                                                                                                               | Comfortable<br>Rather comfortable<br>Moderately comfortable<br>Minimally comfortable<br>Uncomfortable                                                                                                                                                                                             |
| Which of the following conditions do you think can be appropriately DIAGNOSED (i.e., detect presence or absence of disease) via telemedicine instead of in-person? Select all that apply                                       | Acute conjunctivitis<br>Diabetic retinopathy<br>Age related macular degeneration<br>Primary open angle glaucoma<br>Acute angle closure glaucoma<br>Uveitis<br>Retinal detachment<br>Cataract<br>Retinopathy of prematurity<br>Strabismus<br>Optic neuritis<br>Corneal abrasions<br>Ruptured globe |
| How comfortable are you managing patient with known diagnoses via a telemedicine visit at present?                                                                                                                             | Comfortable<br>Rather comfortable<br>Moderately comfortable<br>Minimally comfortable<br>Uncomfortable                                                                                                                                                                                             |
| Which of the following conditions do you think can be successfully MANAGED via telemedicine encounters for                                                                                                                     | Acute conjunctivitis<br>Diabetic retinopathy<br>Age related macular degeneration                                                                                                                                                                                                                  |

(Continued)

(Continued)

|                                                                                                                                                                                                         |                                                                                                                                                                                                                                                                                                                                                                                        |
|---------------------------------------------------------------------------------------------------------------------------------------------------------------------------------------------------------|----------------------------------------------------------------------------------------------------------------------------------------------------------------------------------------------------------------------------------------------------------------------------------------------------------------------------------------------------------------------------------------|
| <p>patients with a known and established diagnosis? Select all that apply</p>                                                                                                                           | <p>Primary open angle glaucoma<br/>                 Acute angle closure glaucoma<br/>                 Uveitis<br/>                 Retinal detachment<br/>                 Cataract<br/>                 Retinopathy of prematurity<br/>                 Strabismus<br/>                 Optic neuritis<br/>                 Corneal abrasions<br/>                 Ruptured globe</p> |
| <p>To further improve your telemedical knowledge and skills, which educational modalities would best assist you in developing your capacity to provide care via telemedicine? Select all that apply</p> | <p>Lecture based / Didactics<br/>                 Online modules<br/>                 Simulated telemedicine encounters with directed feedback<br/>                 Real-patient telemedicine encounters with directed feedback</p>                                                                                                                                                    |
| <p>Please provide any ideas or feedback regarding current or future ophthalmology telemedicine curriculum at Massachusetts Eye and Ear</p>                                                              |                                                                                                                                                                                                                                                                                                                                                                                        |
